# Supplementary material for: Effect of Clinical Parameters on Risk of Death from Cancer after Radical Prostatectomy in Men with Localized and Locally Advanced Prostate Cancer
Source: MDPI journal article supplement (doi:10.3390/cancers14082032), 2022-04-18
Supplement: s1 [file s1]

# Supplementary Materials: Effect of clinical parameters on risk of death from cancer after radical prostatectomy in men with localized and locally advanced prostate cancer

Daimantas Milonas, Tomas Ruzgas, Zilvinas Venclovas, Daniele Jonusaite, Aivaras Jonas Matijosaitis, Darius Trumbeckas, Edmundas Varpiotas, Stasys Auskalnis, Darijus Skaudickas, Ramunas Mickevicius, Kestutis Vaiciunas, Jonas Mickevicius and Mindaugas Jievaltas

**Table S1.** Pathological patient characteristics according age <65 vs. ≥65 years.

| Parameter                             | <65 Years ( <i>n</i> = 1309) | ≥65 Years ( <i>n</i> = 1112) | <i>p</i> Value |
|---------------------------------------|------------------------------|------------------------------|----------------|
| Pathological stage (pT), <i>n</i> (%) |                              |                              |                |
| T2                                    | 875 (66.8)                   | 698 (62.8)                   | 0.080          |
| T3a                                   | 345 (26.4)                   | 318 (28.6)                   |                |
| T3b-4                                 | 89 (6.8)                     | 96 (8.6)                     |                |
| PSA, ng/ml – median (IQR)             |                              |                              |                |
|                                       | 6.05 (4.5-9)                 | 6.6 (5-10)                   | <0.001         |
| Lymph node status, <i>n</i> (%)       |                              |                              |                |
| pN0                                   | 331 (25.3)                   | 382 (34.4)                   | <0.001         |
| pN1                                   | 37 (2.8)                     | 46 (4.1)                     |                |
| Unknown                               | 941 (71.9)                   | 684 (61.5)                   |                |
| GG after RP, <i>n</i> (%)             |                              |                              |                |
| 1                                     | 337 (25.8)                   | 293 (26.5)                   | <0.001         |
| 2                                     | 727 (55.6)                   | 559 (50.5)                   |                |
| 3                                     | 149 (11.4%)                  | 102 (9.2)                    |                |
| 4                                     | 42 (3.2%)                    | 67 (6.1)                     |                |
| 5                                     | 53 (4.1%)                    | 85 (7.7)                     |                |
| Unknown                               | 1 (0.1%)                     | 6 (0.4%)                     |                |
| Surgical margins status, <i>n</i> (%) |                              |                              |                |
| Negative                              | 885 (67.6)                   | 732 (65.8)                   | 0.582          |
| Positive                              | 366 (28.0)                   | 332 (29.9)                   |                |
| Unknown                               | 58 (4.4)                     | 48 (4.3)                     |                |

PSA – prostate specific antigen, GG – International Society of Urological Pathology Grade Groups, RP radical prostatectomy, pN0 – negative lymph node, pN1 – positive lymph node.

**Table S2.** Cumulative 5- and 10-year mortality from cancer and other causes in all cohort and sub-groups stratified according to grade group, age and pathological stage.

|                | 5-yr mortality (95%CI) |                 | 10-yr mortality (95%CI) |                  |
|----------------|------------------------|-----------------|-------------------------|------------------|
|                | Prostate cancer        | Other causes    | Prostate cancer         | Other causes     |
| <b>GG1</b>     |                        |                 |                         |                  |
| <65yr + pT2-3a | 0.1 (0.03-0.3)         | 3.8 (3.0-5.3)   | 0.4 (0.1-1.3)           | 11.1 (8.4-13.3)  |
| ≥65yr + pT2-3a | 0.2 (0.06-0.6)         | 8.1 (6.5-10.9)  | 1.0 (0.3-2.9)           | 22.5 (17.7-26.1) |
| <65yr + pT3b-4 | 0.4 (0.1-1.5)          | 8.8 (3.9-13.8)  | 2.0 (0.6-6.4)           | 23.8 (11.8-30.1) |
| ≥65yr + pT3b-4 | 0.9 (0.3-3.6)          | 18.0 (9.4-24.7) | 4.8 (1.4-16.9)          | 43.2 (25.7-51.5) |
| <b>GG2</b>     |                        |                 |                         |                  |
| <65yr + pT2-3a | 0.2 (0.1-0.4)          | 3.6 (2.9-4.8)   | 1.1 (0.6-1.9)           | 10.1 (7.9-12.3)  |
| ≥65yr + pT2-3a | 0.5 (0.3-0.9)          | 7.5 (6.3-9.9)   | 2.5 (1.4-4.4)           | 20.4 (16.5-24.4) |
| <65yr + pT3b-4 | 1.0 (0.5-2.3)          | 7.9 (4.3-10.9)  | 5.1 (2.7-9.6)           | 20.1 (11.8-26.2) |
| ≥65yr + pT3b-4 | 2.5 (1.1-5.3)          | 16.1 (9.2-21.9) | 11.8 (6.3-22.0)         | 35.2 (25.6-45.7) |
| <b>GG3</b>     |                        |                 |                         |                  |
| <65yr + pT2-3a | 0.5 (0.2-1.4)          | 3.1 (1.8-4.9)   | 2.5 (1.0-6.2)           | 8.2 (5.1-12.5)   |
| ≥65yr + pT2-3a | 1.2 (0.5-2.8)          | 6.5 (4.2-9.8)   | 5.9 (2.7-12.9)          | 15.9 (10.7-25.5) |
| <65yr + pT3b-4 | 2.5 (0.9-6.6)          | 6.1 (2.8-10.8)  | 11.8 (4.1-34.3)         | 12.4 (7.9-26.2)  |
| ≥65yr + pT3b-4 | 5.8 (2.5-13.5)         | 11.9 (6.6-20.2) | 26.1 (12.3-55.2)        | 19.3 (17.2-47.5) |
| <b>GG4</b>     |                        |                 |                         |                  |
| <65yr + pT2-3a | 0.9 (0.4-2.2)          | 4.8 (2.5-7.8)   | 4.5 (2.1-10.0)          | 12.2 (7.7-17.8)  |
| ≥65yr + pT2-3a | 2.2 (0.9-5.3)          | 9.9 (6.2-14.2)  | 10.6 (4.8-23.3)         | 22.4 (15.1-36.9) |
| <65yr + pT3b-4 | 4.4 (1.7-11.9)         | 9.0 (4.7-14.1)  | 20.5 (11.1-37.8)        | 15.7 (12.1-35.3) |
| ≥65yr + pT3b-4 | 10.3 (4.1-26.2)        | 16.8 (9.5-29.5) | 42.4 (25.9-69.2)        | 20.1 (16.8-40.2) |
| <b>GG5</b>     |                        |                 |                         |                  |
| <65yr + pT2-3a | 3.1 (1.4-6.8)          | 5.8 (2.2-7.5)   | 14.8 (7.4-29.8)         | 10.5 (5.9-19.4)  |
| ≥65yr + pT2-3a | 7.3 (4.3-12.7)         | 11.3 (4.9-14.8) | 32.0 (17.4-58.8)        | 15.2 (12.8-36.6) |
| <65yr + pT3b-4 | 14.4 (7.7-27.1)        | 6.1 (3.9-14.1)  | 54.6 (34.3-86.9)        | 0 (0-36.4)       |
| ≥65yr + pT3b-4 | 31.3 (19.3-50.6)       | 8.3 (4.4-13.7)  | 84.9 (69.8-100)         | 0 (0-59.9)       |

CI – confidence interval, GG – International Society of Urological Pathology Grade Groups, pT – pathological stage.
